# Supplementary material for: The Impact of Fast Radiation on the Phylogeny of Bactrocera Fruit Flies as Revealed by Multiple Evolutionary Models and Mutation Rate-Calibrated Clock
Source: MDPI journal article supplement (doi:10.3390/insects13070603), 2022-06-30
Supplement: s1 [file s1]

**Table S1.** Results of the model selection of the different BEAST analyses used to estimate divergence times.

|                |                      |                    | <i>Model 2</i>     |                   |                  |                 |                      |                   |                  |                 |
|----------------|----------------------|--------------------|--------------------|-------------------|------------------|-----------------|----------------------|-------------------|------------------|-----------------|
|                |                      |                    | <i>Mut-normal</i>  |                   |                  |                 | <i>Mut-lognormal</i> |                   |                  |                 |
|                |                      |                    | <i>yule_strict</i> | <i>yule_rlxln</i> | <i>bd_strict</i> | <i>bd_rlxln</i> | <i>yule_strict</i>   | <i>yule_rlxln</i> | <i>bd_strict</i> | <i>bd_rlxln</i> |
| <i>Model 1</i> | <i>Mut-normal</i>    | <i>yule_strict</i> | -                  | 62.2              | *                | 54.3            | 9.2                  | 59.6              | #                | 57.2            |
|                |                      | <i>yule_rlxln</i>  | #                  | -                 | #                | #               | #                    | #                 | #                | #               |
|                |                      | <i>bd_strict</i>   | #                  | 58.6              | -                | 50.7            | -                    | 55.9              | #                | 53.5            |
|                |                      | <i>bd_rlxln</i>    | #                  | 7.9               | #                | -               | #                    | 5.2               | #                | *               |
|                | <i>Mut-lognormal</i> | <i>yule_strict</i> | #                  | 53.1              | #                | 45.2            | -                    | 50.4              | #                | 48              |
|                |                      | <i>yule_rlxln</i>  | #                  | *                 | #                | #               | #                    | -                 | #                | #               |
|                |                      | <i>bd_strict</i>   | <b>6.1</b>         | <b>68.3</b>       | <b>9.8</b>       | <b>60.4</b>     | <b>15.3</b>          | <b>65.7</b>       | -                | <b>63.3</b>     |
|                |                      | <i>bd_rlxln</i>    | #                  | *                 | #                | #               | #                    | *                 | #                | -               |

Bayes Factors (BF) were estimated comparing eight BEAST models that combined a mutation prior with either a normal (*Mut-normal*) or lognormal (*Mut-lognormal*) distribution, either a Yule (*yule*) or a Birth-Death (*bd*) model, and either a *strict* or a LOGN relaxed (*rlxln*) clock. Models were compared in a pairwise fashion, by first estimating their Marginal Likelihoods (mL) and corresponding Standard Deviation (SD) and then calculating the Bayes Factors as  $BF = mL_1 - mL_2$ , where model 1 and model 2 are those given in the respective row and column. We only report BF values that satisfied the conditions  $BF > 0$  and  $BF - (SD_1 + SD_2) > 0$ , where  $SD_1$  and  $SD_2$  are the SD values estimated for model 1 and 2. Highlighted on bold are the values for the model (*Mut-lognormal + bd + strict*) favored over all other seven models. # =  $BF < 0$ ; \* =  $BF - (SD_1 + SD_2) < 0$ .
