# Supplementary material for: The Impact of Fast Radiation on the Phylogeny of Bactrocera Fruit Flies as Revealed by Multiple Evolutionary Models and Mutation Rate-Calibrated Clock
Source: MDPI journal article supplement (doi:10.3390/insects13070603), 2022-06-30
Supplement: s1 [file s1]

**TableS2.** SRA databases used to reconstruct the transcriptome of five *Bactrocera* species.

| <b>Species</b>             | <b>SRA databases</b> ( <a href="https://www.ncbi.nlm.nih.gov/sra">https://www.ncbi.nlm.nih.gov/sra</a> ) |
|----------------------------|----------------------------------------------------------------------------------------------------------|
| <i>Bactrocera bryoniae</i> | SRX2791703                                                                                               |
| <i>Bactrocera correcta</i> | SRX2013592, SRX2013591, SRX2013590, SRX2013589, SRX2372821, SRX2372818, SRX2372817                       |
| <i>Bactrocera jarvisi</i>  | SRX2791705, SRX697442, SRX697441, SRX697440, SRX697437, SRX697435, SRX697434, SRX697431, SRX697428       |
| <i>Bactrocera musae</i>    | SRX2791704                                                                                               |
| <i>Bactrocera zonata</i>   | SRX2016849, SRX2016848, SRX2016847, SRX2016846                                                           |
